# 1 Exploring the impact of inoculum dose on host immunity and 2 morbidity to inform model-based vaccine design

3 2018-04-30

## 4 Authors

- 5 • Andreas Handel<sup>1</sup>, Department of Epidemiology and Biostatistics, The University of  
6 Georgia, Athens, GA, USA
- 7 • Yan Li, Institute of Bioinformatics, The University of Georgia, Athens, GA, USA. Current  
8 address: Center for Research Informatics, University of Chicago, Chicago, IL, USA
- 9 • Brian McKay, Department of Epidemiology and Biostatistics, The University of Georgia,  
10 Athens, GA, USA
- 11 • Kasia A. Pawelek, Department of Mathematics and Computational Science, University  
12 of South Carolina Beaufort, Bluffton, SC, USA
- 13 • Veronika Zarnitsyna, Department of Microbiology and Immunology, Emory University  
14 School of Medicine, Atlanta, GA, USA
- 15 • Rustom Antia, Department of Biology, Emory University, Atlanta, GA, USA

16 <sup>1</sup> corresponding author: [ahandel@uga.edu](mailto:ahandel@uga.edu)

## 17 Abstract

18 Background: Vaccination is an effective method to protect against infectious diseases. An  
19 important consideration in any vaccine formulation is the inoculum dose, i.e., amount of  
20 antigen or live attenuated pathogen that is used. Higher levels generally lead to better  
21 stimulation of the immune response but might cause more severe side effects and allow for  
22 less population coverage in the presence of vaccine shortages. Determining the optimal  
23 amount of inoculum dose is an important component of rational vaccine design. A  
24 combination of mathematical models with experimental data can help determine the  
25 impact of the inoculum dose.

26 Methods: We designed mathematical models and fit them to data from influenza A virus  
27 (IAV) infection of mice and human parainfluenza virus (HPIV) of cotton rats at different  
28 inoculum doses. We used the model to predict the level of immune protection and  
29 morbidity for different inoculum doses and to explore what an optimal inoculum dose  
30 might be.

31 Results: We show how a framework that combines mathematical models with  
32 experimental data can be used to study the impact of inoculum dose on important  
33 outcomes such as immune protection and morbidity. We find that the impact of inoculum  
34 dose on immune protection and morbidity depends on the pathogen and both protection

35 and morbidity do not always increase with increasing inoculum dose. An intermediate  
36 inoculum dose can provide the best balance between immune protection and morbidity,  
37 though this depends on the specific weighting of protection and morbidity.

38 Conclusions: Once vaccine design goals are specified with required levels of protection and  
39 acceptable levels of morbidity, our proposed framework which combines data and models  
40 can help in the rational design of vaccines and determination of the optimal amount of  
41 inoculum.

## 42 Introduction

43 Vaccines are the best and most cost-effective defenses we have against many infectious  
44 diseases. While the composition of a vaccine can be complex, the most important  
45 component is the antigen of the pathogen against which one wants to immunize [1].  
46 Different types of vaccines exist, those based on antigens that contain the pathogen in a  
47 non-replicating form, and those that contain the pathogen in a replicating form, usually  
48 attenuated to reduce morbidity and mortality [1].

49 When deciding on the inoculum dose for a vaccine, one often needs to strike a balance  
50 between conflicting goals. Higher doses generally lead to more immunity and better  
51 protection [2]. Lower doses might reduce vaccine side effects and might also be required if  
52 there is a vaccine shortage, for instance due to a pandemic emergency, manufacturing  
53 issues or high costs [3,4]. The ability to predict how changes in inoculum dose impact  
54 immune protection and morbidity, and how to achieve the best balance between enough  
55 inoculum to trigger a robust immune response and low enough inoculum would  
56 significantly contribute toward better vaccine design [5–12].

57 Currently, the main way to determine vaccine inoculum dose is by trial and error, which is  
58 expensive and logistically challenging [13–16]. A way to improve this approach is to  
59 combine mathematical models with experimental data. Such approaches are commonly  
60 applied to drugs, where pharmacokinetic/pharmacodynamic (PK/PD) models are used in  
61 combination with experimental data to try and optimize drug dosing regimens [17].  
62 Application of a similar approach to vaccines has been recently proposed for tuberculosis  
63 [18].

64 Here, we develop and analyze a quantitative modeling framework that might allow us to  
65 eventually predict the optimal inoculum dose for a given vaccine and setting. We develop  
66 our modeling framework for live attenuated vaccines using data from two infection  
67 experiments, namely influenza A virus (IAV) and human parainfluenza virus (HPIV). We  
68 further investigate a scenario for an inactivated vaccine.

69 Influenza A virus remains a serious health concern. While a vaccine exists, it needs to be  
70 reformulated regularly. Even when the vaccine is well-matched to the circulating strain, its  
71 efficacy is not as good as that of other vaccines, especially in the elderly. It has been  
72 suggested that using a higher inoculum dose in vaccines for this population might be  
73 beneficial [19]. Development of a better vaccine that remains protective in the presence of  
74 antigenic drift and that has a higher efficacy remains a priority.

75 Human parainfluenza virus (HPIV) is an important cause of lower respiratory tract illness  
76 in children [20–24]. There is currently no licensed vaccine available against HPIV  
77 [11,21,24], despite various attempts to develop such a vaccine [25].

78 While the two pathogens we analyze here are important on their own, we consider the  
79 most important contribution of this study to be the development of a conceptual,  
80 quantitative framework that may be used to rationally design vaccines and determine an  
81 optimal inoculum dose for any pathogen.

## 82 **Materials and Methods**

### 83 **Experimental data**

84 We analyzed data from two previously published studies, one on influenza A virus (IAV)  
85 infections in mice [26] and the other on human parainfluenza virus (HPIV) type 3 infection  
86 in cotton rats [27].

87 For the IAV study, groups of mice were infected with 6 different inoculum doses of the  
88 H1N1 PR8 strain of influenza. Geometric mean viral titers were recorded at different times  
89 following the infection with each dose. In addition, lung damage was measured and scored.

90 For the HPIV study, groups of cotton rats were infected with 5 different doses of HPIV-3.  
91 Geometric mean viral titers were recorded at different times following infection in both  
92 lung and nose. For the highest inoculum dose, the study additionally reported several virus  
93 measurements over the first 96 hours. The study also reported antibody titers 21 days  
94 after infection for the 3 lowest inoculum doses for which virus data was reported.

95 We used an additional data set to estimate a mapping between innate immune response  
96 strength and morbidity. This data was taken from a previously reported challenge study of  
97 influenza infection in human volunteers [28]. We used the reported values for different  
98 components of the innate response (IFN- $\alpha$ , IL6, IL8 and TNF- $\alpha$ ) and total symptom score as  
99 measure of morbidity.

100 For further experimental details, we refer the reader to the original studies.

### 101 **Mechanistic dynamical infection model**

102 We formulated and implemented a mechanistic, dynamical model of the infection dynamics  
103 based on a set of ordinary differential equations. The model is based on our previous work,  
104 where we analyzed the relationship between inoculum dose and viral load dynamics [29].  
105 The model is also similar to many other models that have recently been used to model  
106 acute viral infections (see e.g. [30–33]).

107 Our model tracks target cells, virus, and certain immune response components. Uninfected  
108 cells,  $U$ , become infected by free virus,  $V$ , at rate  $b$ . Infected cells,  $I$ , produce virus at rate  $p$   
109 and die at rate  $d_I$ . For purposes of comparison with the data, we keep track of dead cells  
110 through an extra compartment,  $D$ .

111 Free virus infects cells at rate  $b'$ , is cleared by antibodies at rate  $k'_A$  or removed due to other  
 112 mechanisms (e.g. mechanical transport) at rate  $d_V$ . Note that  $b'$  and  $k'_A$  differ from  
 113 parameters  $b$  and  $k_A$  to account for experimental units (PFU for virus and titer for  
 114 antibody). Since we are modeling short, acute infections, we follow the usual assumption  
 115 and ignore growth and death of uninfected target cells [30,31].

116 In addition to the basic infection process, we also model components of the innate and  
 117 adaptive immune response. We consider a generic innate response,  $F$ , which is produced  
 118 and decays at rates  $p_F$  and  $d_F$  in the absence of an infection. Presence of virus leads to an  
 119 increase in the innate response, with growth saturating at a maximum rate  $g_F$ . The  
 120 maximum level the innate response can reach is given by the saturation parameter  $F_{max}$ .  
 121 Since the innate response units are arbitrary, the model is set up such that in the absence of  
 122 infection, the innate response is at a steady level of  $F = 1$ , which leads to  $p_F = d_F$ . We also  
 123 fix the parameter representing the decay rate at  $d_F = 1$  per day, which is in line with  
 124 estimates from an influenza infection analysis in ponies [34].

125 The innate response is modeled as having two main mechanisms of action. First, it can  
 126 directly counteract the virus by, for instance, reducing virus production rate of infected  
 127 cells [35]. In our model, the strength of production suppression is determined by the  
 128 parameter  $s_F$ . The second action of the innate response is to induce the adaptive response,  
 129 as described next.

130 For the adaptive response, we focus on B-cells and antibodies, which are the major  
 131 correlates of protective immunity for most vaccines, including HPIV and IAV [23,36]. The  
 132 dynamics of activated B cells is modeled as increasing in a sigmoidal manner dependent on  
 133 both the amount of virus (antigen) and the innate response, with a maximum rate  $g_B$ . Since  
 134 we are focusing on the short-term dynamics of the system, B-cell decay is ignored. In the  
 135 absence of an infection, B-cells are set to an arbitrary level of 1. B-cells produce antibodies  
 136 at rate  $r_A$ . Antibodies decay naturally at rate  $d_A$  and bind to and remove free virus at rate  
 137  $k_A$ .

138 The model is implemented as a set of ordinary differential equations given by the following  
 139 set of equations:

$$\begin{aligned}
 \text{Uninfected cells } \dot{U} &= -bUV \\
 \text{Infected cells } \dot{I} &= bUV - d_I I \\
 \text{Dead cells } \dot{D} &= d_I I \\
 \text{Virus } \dot{V} &= \frac{p}{1 + s_F F} I - d_V V - k'_A AV - b'UV \\
 \text{Innate response } \dot{F} &= p_F - d_F F + \frac{V}{V + h_V} g_F (F_{max} - F) \\
 \text{B cells } \dot{B} &= \frac{FV}{FV + h_F} g_B B \\
 \text{Antibodies } \dot{A} &= r_A B - d_A A - k_A AV
 \end{aligned} \tag{1}$$

## 140 Model fitting

141 The model is fit to the IAV and HPIV data. For IAV the fit is to the virus load and lung  
142 damage data. For HPIV, the fit is to the virus load and antibody data. For each pathogen, we  
143 fit data for all different inoculum doses simultaneously to the model. For each inoculum  
144 dose,  $i$ , we estimate the starting value for the virus inoculum,  $V_i$ . All other model  
145 parameters are shared across different inoculum doses.

146 Model performance is assessed by the sum of squared residuals (SSR). To allow  
147 computation of a single SSR value for the different experimental variables, the contribution  
148 of each variable is non-dimensionalized by dividing by the variance of the data. To give the  
149 different experimental variables comparable importance, we also divide each variable by  
150 the number of data points. This amounts to over-weighting the few data points for lung  
151 damage (AIV) and antibody response (HPIV) and reducing the weight for the more plentiful  
152 viral load data. Mathematically, the expression for the SSR is given by

$$SSR = \sum_{i,t} \frac{1}{N_{Vd}} \frac{(V_{i,t}^m - V_{i,t}^d)^2}{\sigma^2(V^d)} + \frac{1}{N_{Xd}} \frac{(X_{i,t}^m - X_{i,t}^d)^2}{\sigma^2(X^d)}$$

153 Here,  $V$  is viral load (on a log scale) and  $X$  represents either antibodies (for HPIV) or  
154 damage (for IAV), the superscript indicates model ( $m$ ) or data ( $d$ ), the sum runs over all  
155 inoculum doses,  $i$ , and all time points,  $t$ .  $N$  indicates the number of data points for either the  
156 virus or the other variable,  $\sigma^2$  indicates the variance for that variable. Since both damage  
157 and antibodies ( $X$ ) are measured in different units in the data and the model, each are  
158 normalized before subtracting and squaring. While this re-scaling is only necessary for the  
159 instances where we compare model and data (lung damage for IAV and antibodies for  
160 HPIV), for consistency between models, we show re-scaled values for both lung damage  
161 and antibodies for both AIV and HPIV.

162 The model is being fit by varying model parameters to minimize the  $SSR$ . When doing so,  
163 we take into account left-censored nature of the data. If the reported virus load is at or  
164 below the limit of detection (LOD, which is 0.27 log<sub>10</sub> units for IAV and 2 log<sub>10</sub> units for  
165 HPIV as reported in the original studies), we treat the difference between model and data  
166 as being the difference between model and LOD if the model prediction is above the data,  
167 and we do not count any difference between model and data for any model prediction  
168 below the LOD data point [37,38].

## 169 Model implementation

170 All computations were done in the R programming language version 3.4.3 [39]. Fitting was  
171 done using the nloptr optimizer package [40], differential equations were integrated using  
172 the deSolve package [41]. All data and code required to reproduce all results presented  
173 here are supplied as supplementary material.

## 174 **Results**

### 175 **Data extraction**

176 The data used for our study was obtained from the original reports as follows.

177 For the IAV study, we obtained log viral load and lung lesion score expressed in percent  
178 lung damage from table 1 of [26]. The viral kinetics of the highest inoculum dose strongly  
179 hints at survivor bias (see figure 1 of [26]). Specifically, the data suggest that sicker mice,  
180 with presumably higher virus load, were killed and sampled first, while less sick mice, with  
181 presumably lower virus load, were kept alive and sampled later. We, therefore, decided to  
182 exclude the data for the highest inoculum dose from consideration, leaving us with viral  
183 load and percent lung damage data for 5 different inoculum doses.

184 For the HPIV study, we focused on lung viral load. The data was extracted from figures 1  
185 and 2 of [27] using Engauge Digitizer [42]. Viral load kinetics for the highest inoculum were  
186 measured twice with some overlap in times (24h and 96h). We averaged data for these  
187 times from the 2 experiments. We additionally obtained data on antibody titers for those  
188 inoculum doses for which viral load was reported (the 3 lowest inoculum doses) from  
189 figure 3 of [27].

190 For the data linking innate response to symptoms, total symptoms score data was extracted  
191 from figure 3 and innate immune response data from figures 5 and 6 of [28] using Engauge  
192 Digitizer. More details on how this data was used are provided in a later section.

193 Data extracted from these 3 studies are shown in Figures 1, 2 and 4 (together with the best  
194 fit models, described below), and are also included in the supplementary material.

### 195 **Model development and fitting**

196 The model we developed is described in detail in the methods section. For each data set, we  
197 fit the model to the viral load data, and either lung damage (IAV) or antibody (HPIV) data.  
198 Details on the fitting approach are provided in the methods section. The model fits and data  
199 for IAV and HPIV are shown in figures 1 and 2 respectively. Parameter values for the best  
200 fits are given in the supplementary material.

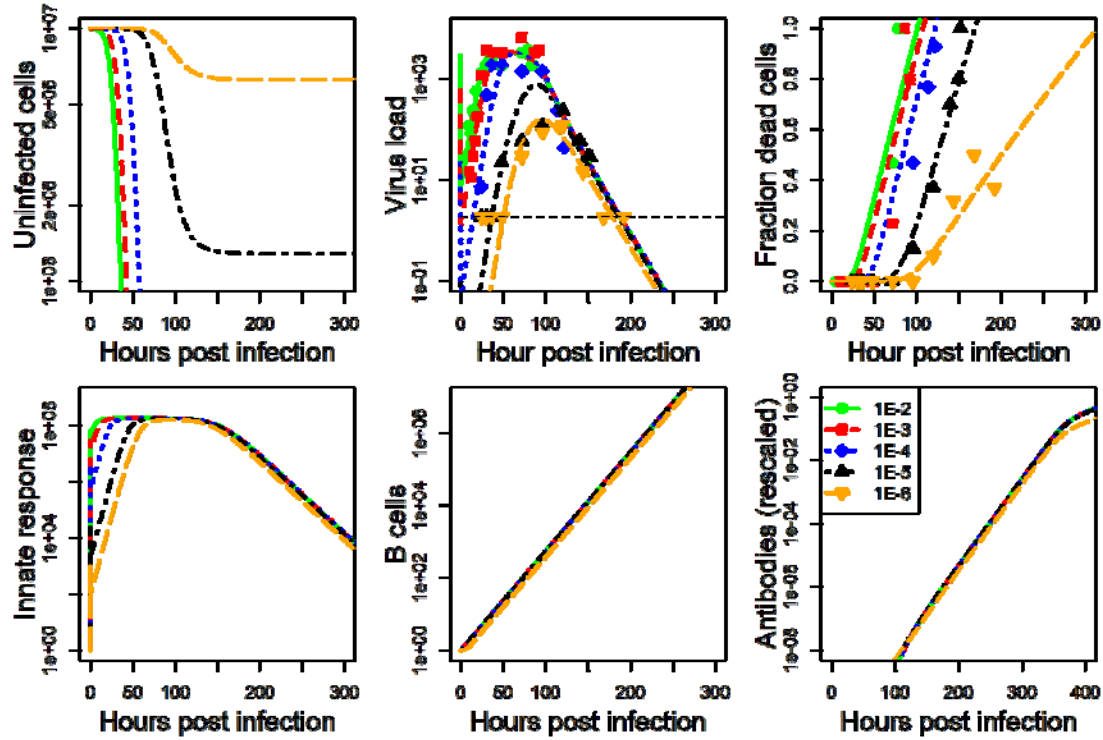

201

202 *Figure 1 IAV infection at five different inoculum doses. Data was available for virus load and*  
203 *cell damage. Kinetics for 6 of the seven model compartments for the best fit model are shown.*  
204 *Infected cells kinetics very closely follows virus kinetics and is therefore not shown. Dashed*  
205 *horizontal line indicates the limit of detection for virus load.*

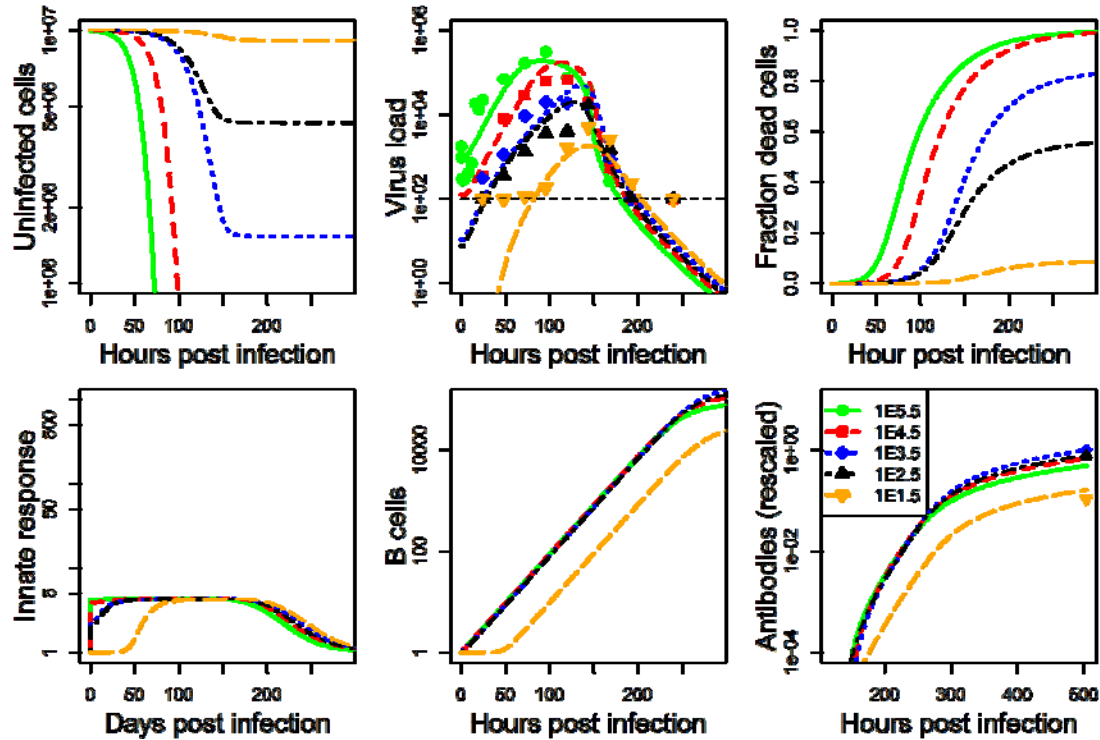

206

207 *Figure 2 HPIV infection at five different inoculum doses. Data was available for virus load and*  
 208 *antibody titers. Kinetics for 6 of the seven model compartments for the best fit model are*  
 209 *shown. Infected cells kinetics very closely follow virus kinetics and is therefore not shown.*  
 210 *Dashed horizontal line indicates the limit of detection for virus load.*

## 211 Quantifying Immune Protection

212 We want to quantify the amount of protective immunity induced by different inoculum  
 213 doses. We focus on the B-cell and antibody component of the adaptive immune response.  
 214 Provided antibodies are specific to the pathogen, higher levels of antibodies generally lead  
 215 to better protection [43–45]. Recent studies for influenza vaccines [46,47] have shown that  
 216 the following function provides a good mapping from antibody titer to the level of  
 217 protection from infection:

---

218 Here, the level of protection,  $\rho$ , varies between 0 and 1, with low protection for low levels  
 219 of antibody titer,  $A$ , and maximum protection at high levels. The constants  $\alpha$  and  $\beta$   
 220 determine the slope of the curve and the level at which protection is at 50% respectively  
 221 (see [46] for more details). This functional shape is also consistent with data for other  
 222 pathogens [43–45]. Figure 3 illustrates this relationship between antibody levels and  
 223 protection graphically.



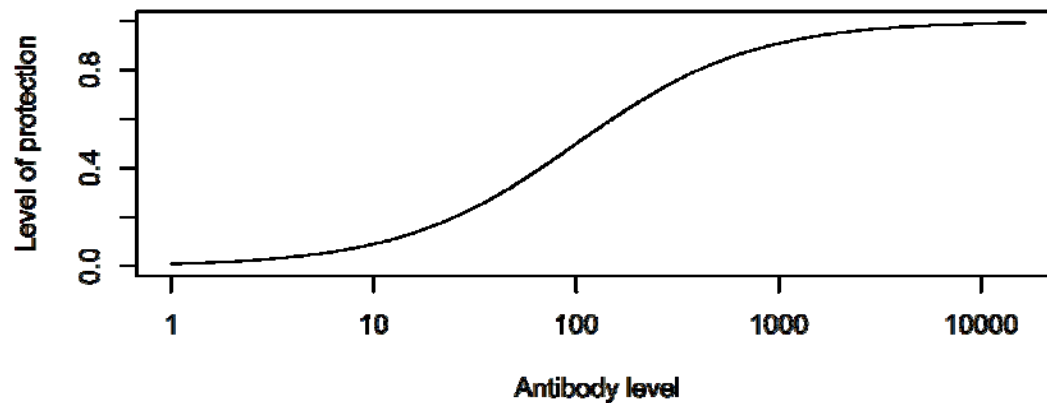

224

225 *Figure 3 Protection as function of antibody levels ( $k_1 = 1$ ,  $k_2 = \log(100)$ ).*

226 Our model represents antibodies in units of numbers of antibodies. In general,  
227 experimental studies report antibody neutralizing titers or similar assay-specific units. For  
228 this reason, and because we have no data for the correlation between antibody titers and  
229 protection for either the HPIV or IAV data we analyze, it is impossible to determine specific  
230 choices for  $k_1$  and  $k_2$  for our study systems. We instead chose values such that the antibody  
231 levels considered span the full range from low to high protection levels. Specifically, we set  
232  $k_1 = 1$  and  $k_2 = \log(100)$  where  $k_1$  is the range of antibody levels predicted by our model  
233 for different inoculum doses and  $k_2$  is the expected value. This choice is essentially arbitrary  
234 and therefore the protection curves we present below are to be understood conceptually.

## 235 **Quantifying Morbidity**

236 It is still not fully understood how virus and immune response affect host morbidity, i.e. the  
237 severity of symptoms. For virus infections, host morbidity can result in virus-induced death  
238 of infected cells, as well as immune response mediated pathology. A study of influenza  
239 infection in humans showed that a model in which symptom score was proportional to  
240 innate cytokine levels provided an adequate fit to the data [48]. Another study of influenza  
241 infections used a combination of innate cytokine (interferon) levels and cell death to define  
242 morbidity as  $M = \frac{D}{N}$ , where  $D$  is the total number of dead cells, and  
243  $N$  was chosen to be a sigmoidal mapping of log interferon levels [49]. Similarly, a previous  
244 model for dengue infections assumed that morbidity was proportional to the peak of the  
245 innate response, i.e.  $M = \frac{I}{I_{max}}$  [50]. In the case of vaccines, strong pathological effects  
246 such as the death of a meaningful fraction of target cells do not occur. It therefore seems  
247 most reasonable to express morbidity (strength of symptoms) as a function of the innate  
248 immune response.

249 To obtain an estimate for a mapping between innate immune response and morbidity, we  
250 use data from a previously reported challenge experiment of influenza infection in human  
251 volunteers [28]. We use the reported values for different components of the local innate

252 response (IFN- $\alpha$ , IL6, IL8, and TNF- $\alpha$ ) and, after scaling each component to a maximum  
253 value of 1, sum them to obtain an estimate for the total innate response strength. This total  
254 response quantity is again scaled and then mapped to morbidity, measured as total  
255 symptom score. Figure 4 shows the data.

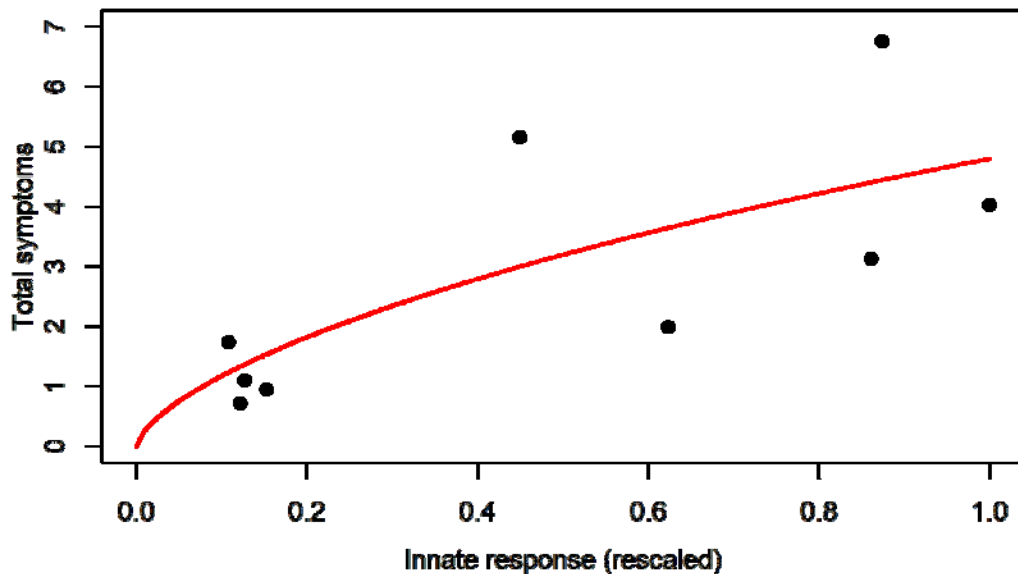

256

257 *Figure 4 Data and best fit model for the connection between immune response and symptoms.*

258 Also shown is the best fit of a sigmoidal model that provides a mapping between innate  
259 response and morbidity. The model is given by

260 where  $S$  is morbidity as measured by total symptom score, and  $I$  is the scaled innate  
261 response. Best fit parameter values are  $K = 6.5$  and  $\alpha = 0.66$ . The parameter  $K$  was fixed at  
262 36, corresponding to the maximum score possible based on the study protocol [28]. While a  
263 simpler linear model would fit the data equally well, it is less biologically reasonable since  
264 it would allow an unbounded increase in symptoms.

265 From our simulations, we obtain the time course of the innate response,  $I(t)$ . After rescaling  
266 this quantity, we use equation (3) to compute the time course for morbidity,  $S(t)$ . Finally, we  
267 take the integral of the morbidity over the duration of the infection to compute total  
268 morbidity as the area under the morbidity curve (MAUC). Since this approach mixes model  
269 simulations based on animal infections with morbidity estimates based on human data, the  
270 resulting morbidity curve should be interpreted in a similar conceptual way as the  
271 protection curve described above.

## 272 Immunity and pathogenesis as function of inoculum

273 After fitting the dynamical infection model (1) to each data set, we used the best-fit  
274 parameter values and ran simulations for a range of inoculum doses. Several time-series  
275 for the IAV and HPIV model simulations spanning the whole range of simulated inoculum  
276 doses are shown in figures 5 and 6.

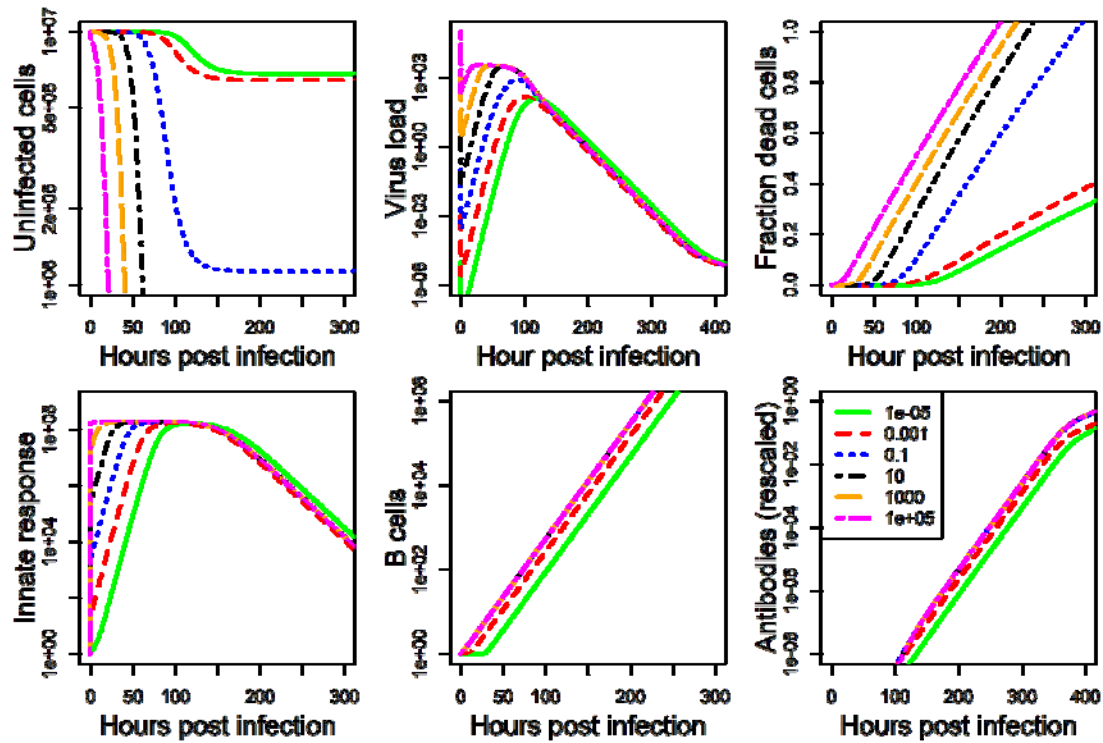

277

278 *Figure 5 IAV model simulation for a range of inoculum doses.*

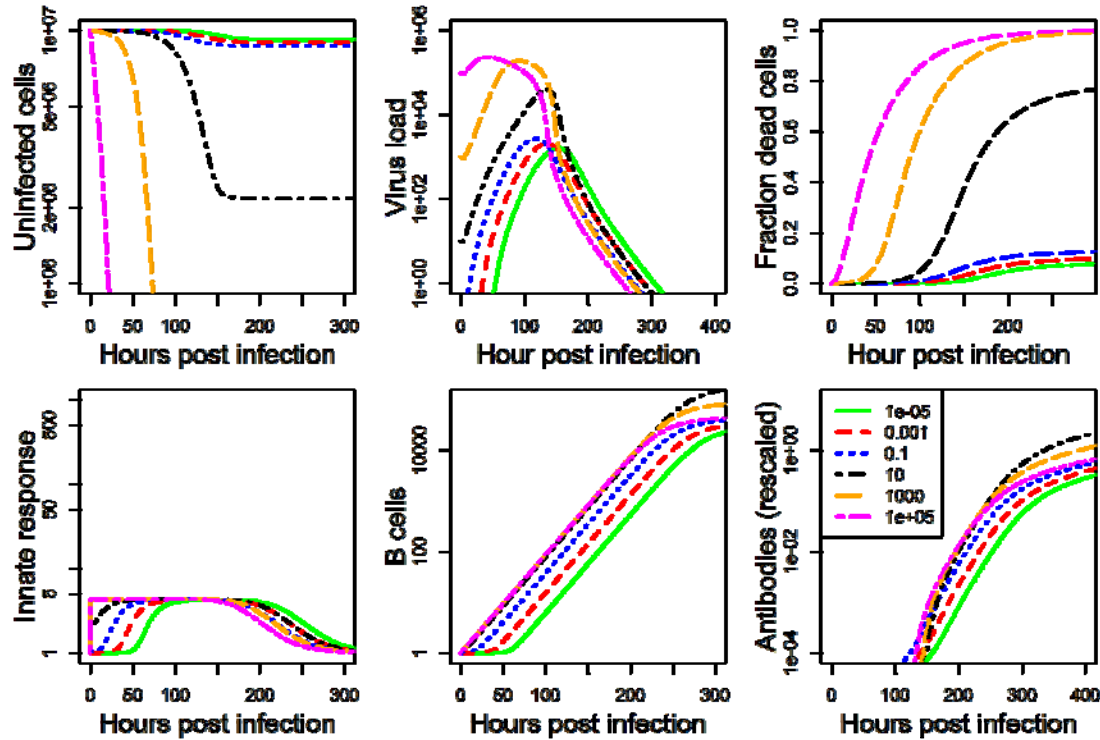

279

280 *Figure 6 HPIV model simulation for a range of inoculum doses.*

281 From these time-series, the level of protection and morbidity was computed. The model is  
282 simulated for 21 days, predicted antibodies are recorded at the final time. From these  
283 antibody levels, we compute immune protection using equation (2). We also record the  
284 predicted innate immune response, and, after scaling, use equation (3) to compute  
285 morbidity, and by integrating the area under the curve, determine the total amount of  
286 morbidity during the infection. Those results for IAV are shown in figure 7,  
287 figure 8 shows results for HPIV.

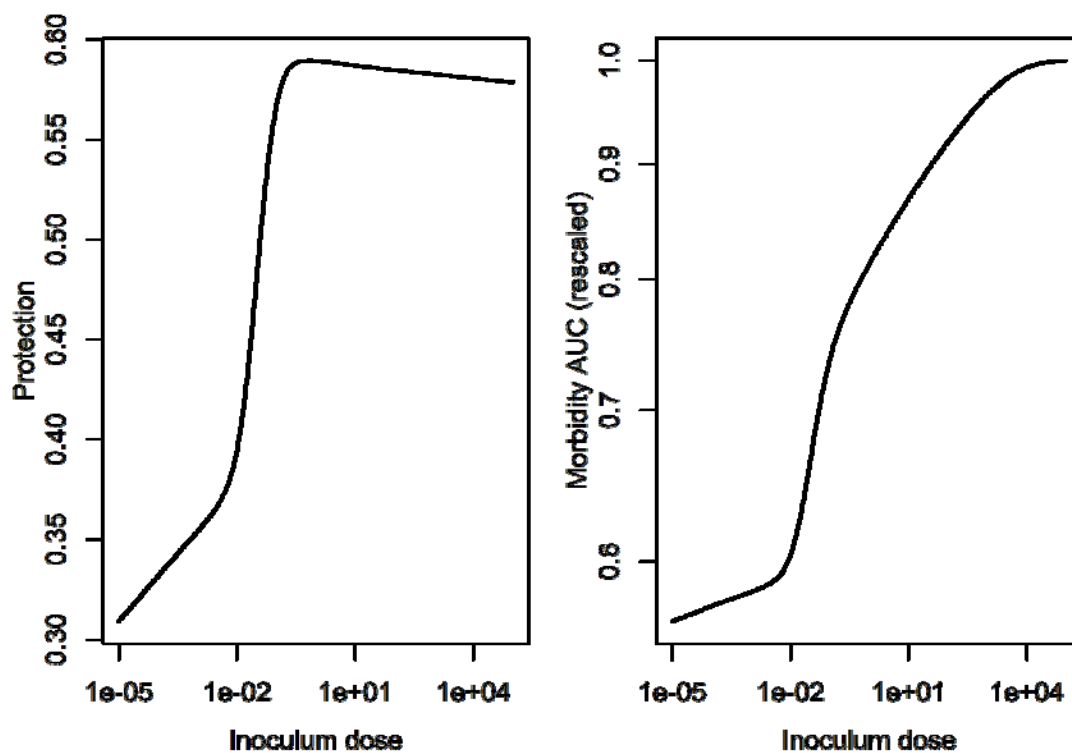

288

289 *Figure 7 Inoculum dependent protection and damage for the IAV infection model.*

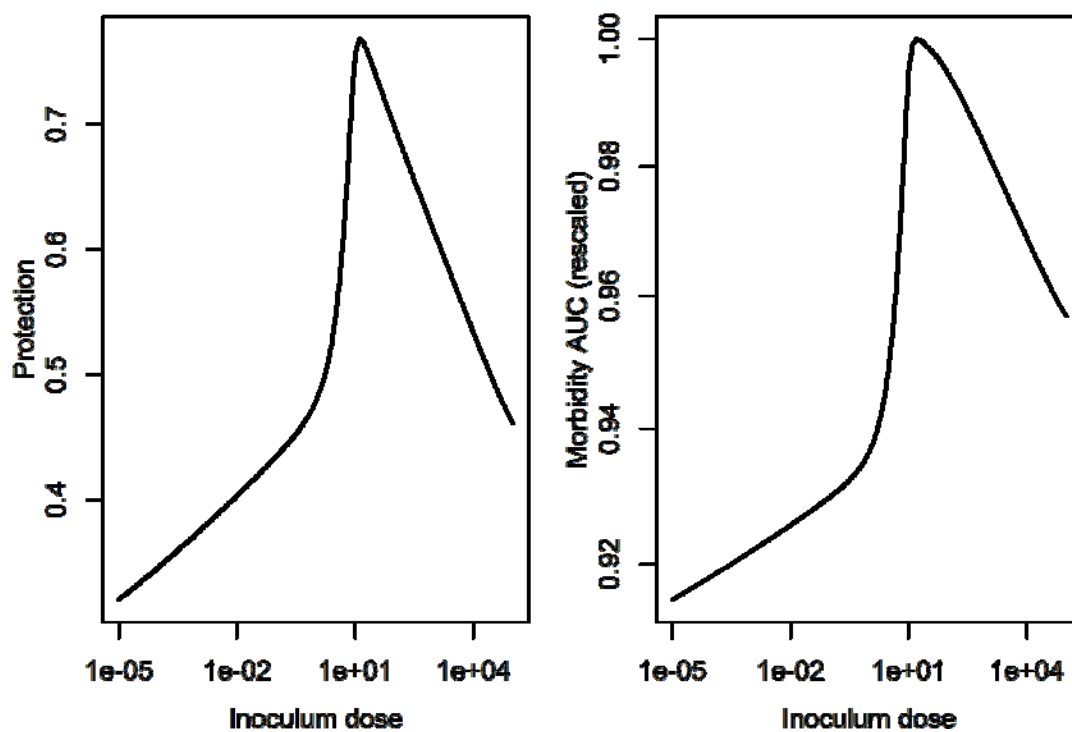

290

291 *Figure 8 Inoculum dependent protection and damage for the HPIV infection model.*

## 292 An inactivated vaccine model

293 The model and data above are for replicating pathogens, as such representing live,  
294 attenuated vaccines. Another important category of vaccines are those where the pathogen  
295 is killed and non-replicating. A modification of the above model can be used to simulate  
296 such a vaccine. For such a vaccine, cells do not get productively infected, and one can  
297 remove the variables tracking uninfected and infected cells. The model simplifies to

$$\begin{aligned}\text{Antigen } \dot{P} &= -d_P P - k'_A A P \\ \text{Innate response } \dot{F} &= p_F - d_F F + \frac{P}{P + h_V} g_F (F_{max} - F) \\ \text{B cells } \dot{B} &= \frac{F P}{F P + h_F} g_B B \\ \text{Antibodies } \dot{A} &= r_A B - d_A A - k_A A P\end{aligned}$$

298 We were not able to find data in the published literature for antigen (and possibly other  
299 model components) time series for different inoculum doses that would be detailed enough  
300 to allow model fitting. We therefore instead chose arbitrary values for model parameters  
301 that produced reasonable dynamics and explored the impact of inoculum/antigen dose on  
302 protection and morbidity for such a generic model. Figure 9 shows simulated time-series  
303 for different inoculum doses and figure 10 shows the resulting predicted immune  
304 protection and morbidity.

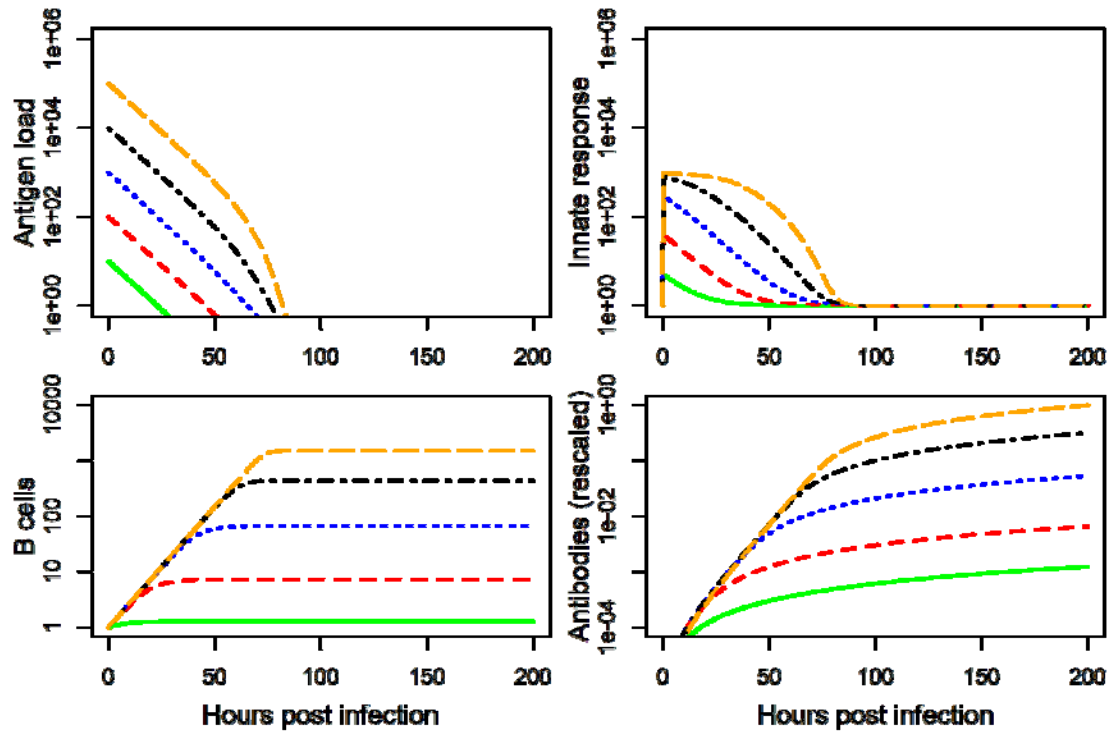

305

306 *Figure 9 Model for non-replicating vaccine. Model parameters were set to*

307

308 *. Initial conditions are  $F = 1$ ,  $B = 1$ ,  $A = 0$  and varying values for antigen load.*

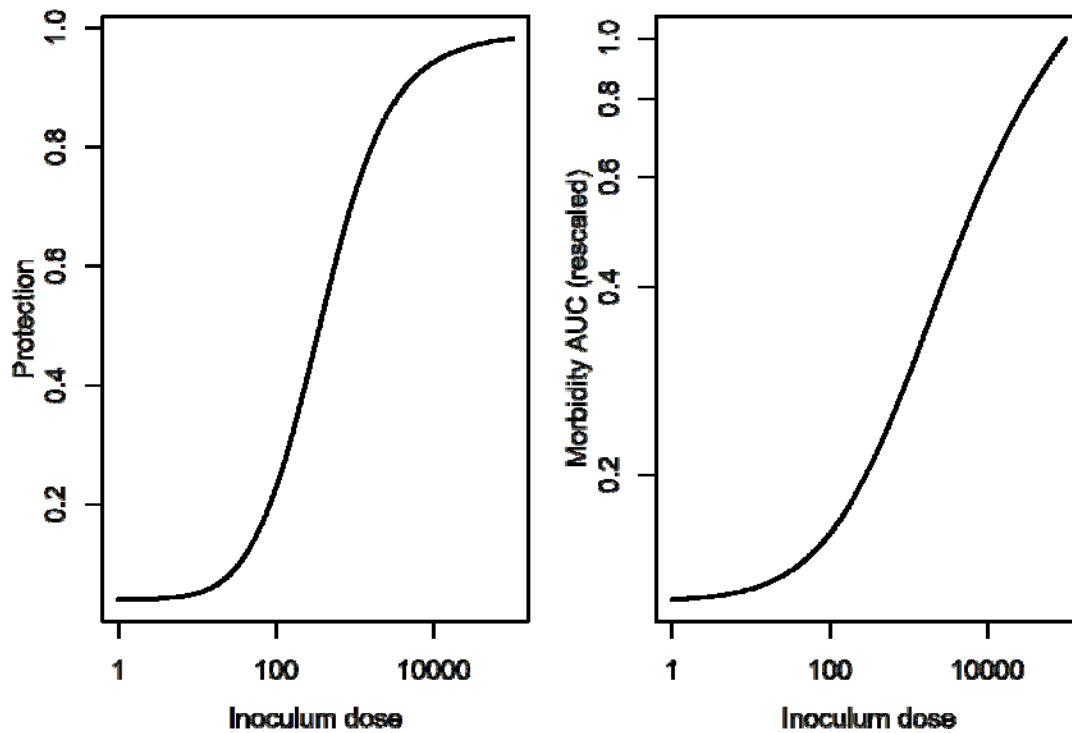

309

310 *Figure 10 Inoculum dependent protection and damage for the inactivated vaccine model.*

## 311 Optimal Inoculum dose illustration

312 Once immune protection and morbidity as a function of inoculum dose are predicted by the  
313 model, one can potentially determine optimal inoculum dose choices. The optimal amount  
314 depends on the main goals of the vaccine formulation. One could, for instance, choose a  
315 minimum acceptable level of immune protection or maximum acceptable level of  
316 morbidity, and determine the inoculum dose for those criteria. Another possibility is to  
317 compute and maximize a quantity that is a compound of immune protection and morbidity,  
318 with specific weights assigned to protection and morbidity. We illustrate this idea  
319 conceptually by looking at a very simple quantity, namely the ratio of immune protection to  
320 morbidity (as defined by the area under the curve),  $P/M$ . Figure 11 shows this quantity for  
321 the IAV and HPIV infections as well as for the inactivated vaccine.

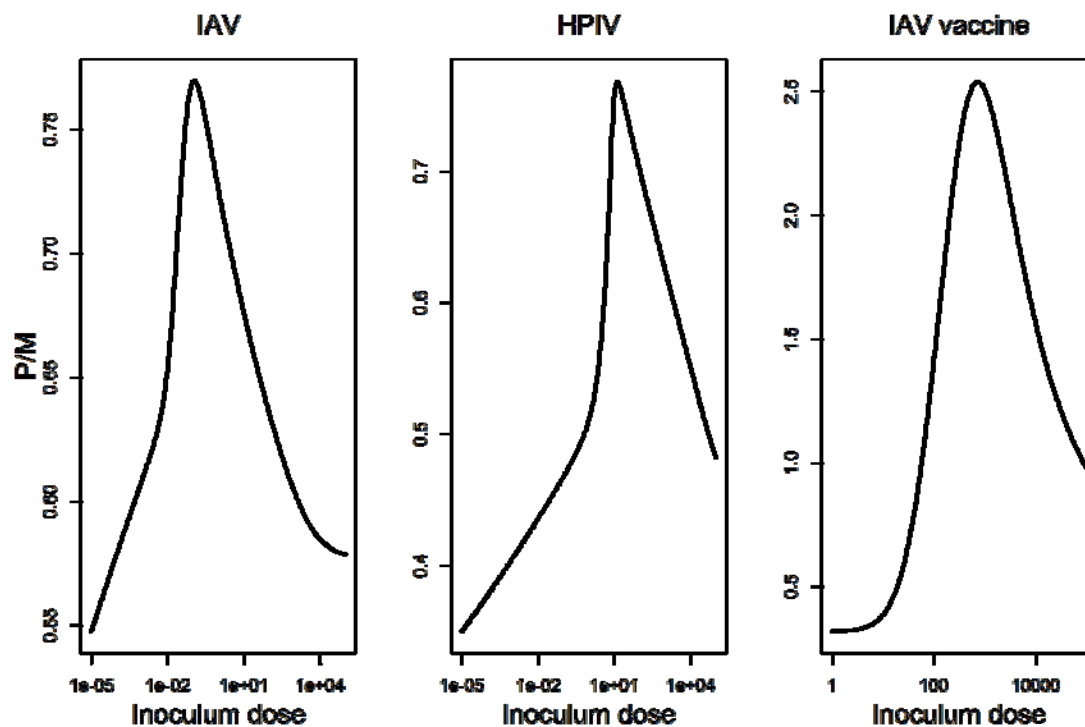

322

323 *Figure 11 Ratio of protection, P, over morbidity, M, for different inoculum doses.*

324 In each case, the amount of inoculum that leads to the highest ratio of  $P/MAUC$  occurs at an  
325 intermediate dose.

## 326 Discussion

327 In many situations, a higher inoculum dose of either live attenuated or killed antigen in a  
328 vaccine leads to a stronger immune response and subsequently likely better antibody or T-  
329 cell mediated immune protection [51]. However, this does not have to be universally true.  
330 Once inoculum doses increase beyond some threshold, the innate immune response might  
331 be triggered too strongly, which in turn could lead to an impaired adaptive immune



332 response and thus reduced immune protection. Similarly, while increased inoculum usually  
333 leads to more morbidity and stronger symptoms, this again might not be universal and  
334 depends on the interaction of pathogen and immune response.

335 In this study, we used a combination of data and models to explore how inoculum dose  
336 impacts immune protection and morbidity. We found that for the examples investigated,  
337 sometimes there is a monotonic or almost monotonic increase of protection and morbidity  
338 as inoculum increases (inactivated vaccine and IAV examples), while other times  
339 protection and morbidity can decline once dose increases beyond some value (HPIV  
340 example). For the illustrative example of an optimal dose based on a simple ratio of  
341 protection to morbidity, all our examples suggest that an intermediate amount of inoculum  
342 dose is optimal.

343 Our study fits into the recently proposed framework of  
344 Immunostimulation/Immunodynamic (IS/ID) modelling, which has been proposed as a  
345 framework to combine models and data for better vaccine formulation decisions [18], in  
346 analogy to the well-established pharmacokinetic/pharmacodynamic (PK/PD) modelling  
347 approach widely used in drug development [17].

348 We believe that using an approach that combines modeling with data can help in the  
349 development of more efficient vaccines. The key toward that goal is the availability and  
350 integration of the right kind of models and data. Since the data we analyzed is a mix of  
351 animal and human data and neither is complete enough to allow the whole modeling  
352 framework to be applied to it, the results presented here are to be considered mainly  
353 conceptually. The ideal type of data tracks antigen or pathogen load and different immune  
354 components over time, as well as morbidity (e.g. through weight loss in mice or symptom  
355 reports in humans) and includes immune protection data through challenge studies. Such  
356 data would need to be collected for several inoculum doses. Integrated with the models we  
357 analyzed here, it could then allow one to predict the impact over a full range of inoculum  
358 doses, including those not experimentally measured.

359 Being able to predict the expected protection achieved for a given inoculum dose can help  
360 in the design of vaccines in cases when only limited antigen is available, e.g. in emergency  
361 situations [4]. Having information on both immune protection and expected morbidity  
362 allows one to determine an optimal inoculum dose based on the - often conflicting - goals of  
363 high protection and low morbidity. For instance, one could systematically answer  
364 questions such as, "If we require at least 80% immune protection, what would the  
365 minimum amount of inoculum need to be? And what level of morbidity/side-effects would  
366 this induce?" Currently, both modeling and experiments are not yet able to be used in such  
367 a specific manner. However, a tighter integration of experiments with models, and further  
368 model refinement should allow one to use the modeling approach discussed here in the  
369 future to help design vaccines.

370 Some promising extensions and refinements of the models are inclusion of further  
371 components of the immune response. For instance, given that T-cells are also known to  
372 play an important role in immune protection and are affected by inoculum dose [52,53], it  
373 would be beneficial to extend experimental and modeling studies in the future and

374 consider both the B-cell and T-cell components of the adaptive response. Similarly,  
375 provided more detailed data on specific components of the innate response is available,  
376 including those components explicitly in the models might be useful. Another extension  
377 would be to consider stochastic models, which would better be able to capture variation  
378 among patients. This would require individual host data to be available for analysis and  
379 modeling.

380 To summarize, we developed a modeling framework that might allow a systematic and  
381 quantitative determination of the impact of different inoculum doses on resulting immune  
382 protection and morbidity. We applied this approach to several data sets to illustrate the  
383 general concept and show how it can lead to important insights, e.g. 'more inoculum does  
384 not always lead to more immune protection'. The modeling and analysis framework  
385 presented here can be applied to data from specific vaccine candidates and help to more  
386 efficiently determine the optimal dose.

## 387 **Acknowledgements**

388 We thank the Antia group members for helpful discussions.

389 AH, VZ and RA were partially supported by NIH/NIAID grant U19AI117891. KAP was  
390 partially supported by a NIH/NIGMS grant P20GM103499, SC INBRE. The funders had no  
391 role in study design, data collection and analysis, decision to publish, or preparation of the  
392 manuscript.

## 393 **References**

394 1. Ada G. Overview of vaccines and vaccination. *Molecular biotechnology*. 2005;29: 255–  
395 272. doi:[10.1385/MB:29:3:255](https://doi.org/10.1385/MB:29:3:255)

396 2. Marois I, Cloutier A, Garneau É, Richter MV. Initial infectious dose dictates the innate,  
397 adaptive, and memory responses to influenza in the respiratory tract. *Journal of leukocyte*  
398 *biology*. 2012;92: 107–121. doi:[10.1189/jlb.1011490](https://doi.org/10.1189/jlb.1011490)

399 3. Falsey AR. Half-dose influenza vaccine: Stretching the supply or wasting it? *Archives of*  
400 *internal medicine*. 2008;168: 2402–2403. doi:[10.1001/archinte.168.22.2402](https://doi.org/10.1001/archinte.168.22.2402)

401 4. Monath TP, Woodall JP, Gubler DJ, Yuill TM, Mackenzie JS, Martins RM, et al. Yellow fever  
402 vaccine supply: A possible solution. *Lancet (London, England)*. 2016;387: 1599–1600.  
403 doi:[10.1016/S0140-6736\(16\)30195-7](https://doi.org/10.1016/S0140-6736(16)30195-7)

404 5. Crotty S, Ahmed R. Immunological memory in humans. *Seminars in Immunology*.  
405 2004;16: 197–203. doi:[10.1016/j.smim.2004.02.008](https://doi.org/10.1016/j.smim.2004.02.008)

406 6. Seder RA. T-cell quality in memory and protection: Implications for vaccine design.  
407 *Nature Reviews Immunology*. 2008;8: 486.

- 408 7. R R. Bridging the knowledge gaps in vaccine design. *Nature Biotechnology*. 2007;25:  
409 1361–1366.
- 410 8. Pulendran B, Ahmed R. Immunological mechanisms of vaccination. *Nature Immunology*.  
411 2011;12: 509–517. doi:[10.1038/ni.2039](https://doi.org/10.1038/ni.2039)
- 412 9. Amanna IJ, Slifka MK. Wanted, dead or alive: New viral vaccines. *Antiviral Research*.  
413 2009;84: 119–130. doi:[10.1016/j.antiviral.2009.08.008](https://doi.org/10.1016/j.antiviral.2009.08.008)
- 414 10. Bernstein DI, Falloon J, Yi T. A randomized, double-blind, placebo-controlled, phase  
415 1/2a study of the safety and immunogenicity of a live, attenuated human parainfluenza  
416 virus type 3 vaccine in healthy infants. *Vaccine*. Cincinnati Children’s Hospital Medical  
417 Center, University of Cincinnati, 3333 Burnet Avenue, Cincinnati, OH 45229, USA.  
418 david.bernstein@cchmc.org; 2011;29: 7042–7048. doi:[10.1016/j.vaccine.2011.07.031](https://doi.org/10.1016/j.vaccine.2011.07.031)
- 419 11. Karron RA, Thumar B, Schappell E, Surman S, Murphy BR, Collins PL, et al. Evaluation of  
420 two chimeric bovine-human parainfluenza virus type 3 vaccines in infants and young  
421 children. *Vaccine*. 2012;30: 3975–3981. doi:[10.1016/j.vaccine.2011.12.022](https://doi.org/10.1016/j.vaccine.2011.12.022)
- 422 12. Koopman G, Mooij P, Dekking L, Mortier D, Nieuwenhuis IG, Heteren M van, et al.  
423 Correlation between virus replication and antibody responses in macaques following  
424 infection with pandemic influenza A virus. *Journal of virology*. 2015;90: 1023–1033.  
425 doi:[10.1128/JVI.02757-15](https://doi.org/10.1128/JVI.02757-15)
- 426 13. Treanor J, Keitel W, Belshe R, Campbell J, Schiff G, Zangwill K, et al. Evaluation of a single  
427 dose of half strength inactivated influenza vaccine in healthy adults. *Vaccine*. 2002;20:  
428 1099–1105.
- 429 14. Cooper CL, Davis H, Cameron DW. Influenza vaccination with 1/10th the full dose. *The*  
430 *New England journal of medicine*. 2004;351: 2339–2340.  
431 doi:[10.1056/NEJM200411253512219](https://doi.org/10.1056/NEJM200411253512219)
- 432 15. Martins RM, Maia M de LS, Farias RHG, Camacho LAB, Freire MS, Galler R, et al. 17DD  
433 yellow fever vaccine: A double blind, randomized clinical trial of immunogenicity and  
434 safety on a dose-response study. *Human vaccines & immunotherapeutics*. 2013;9: 879–  
435 888. doi:[10.4161/hv.22982](https://doi.org/10.4161/hv.22982)
- 436 16. Campi-Azevedo AC, Almeida Estevam P de, Coelho-Dos-Reis JG, Peruhype-Magalhães V,  
437 Villela-Rezende G, Quaresma PF, et al. Subdoses of 17DD yellow fever vaccine elicit  
438 equivalent virological/immunological kinetics timeline. *BMC infectious diseases*. 2014;14:  
439 391. doi:[10.1186/1471-2334-14-391](https://doi.org/10.1186/1471-2334-14-391)
- 440 17. Ambrose PG, Bhavnani SM, Rubino CM, Louie A, Gumbo T, Forrest A, et al.  
441 Pharmacokinetics-pharmacodynamics of antimicrobial therapy: It’s not just for mice  
442 anymore. *Clinical infectious diseases : an official publication of the Infectious Diseases*  
443 *Society of America*. 2007;44: 79–86. doi:[10.1086/510079](https://doi.org/10.1086/510079)
- 444 18. Rhodes SJ, Zelmer A, Knight GM, Prabowo SA, Stockdale L, Evans TG, et al. The tb  
445 vaccine h56+ic31 dose-response curve is peaked not saturating: Data generation for new

- 446 mathematical modelling methods to inform vaccine dose decisions. *Vaccine*. 2016;  
447 doi:[10.1016/j.vaccine.2016.10.060](https://doi.org/10.1016/j.vaccine.2016.10.060)
- 448 19. Wong S-S, Webby RJ. Traditional and new influenza vaccines. *Clinical microbiology*  
449 *reviews*. 2013;26: 476–492. doi:[10.1128/CMR.00097-12](https://doi.org/10.1128/CMR.00097-12)
- 450 20. Reed G, Jewett PH, Thompson J, Tollefson S, Wright PF. Epidemiology and clinical  
451 impact of parainfluenza virus infections in otherwise healthy infants and young children <5  
452 years old. *The Journal of Infectious Diseases*. 1997;175: 807–813. Available:  
453 <http://www.jstor.org/stable/30129412>
- 454 21. Hall CB. Respiratory syncytial virus and parainfluenza virus. *The New England Journal*  
455 *of Medicine*. 2001;344: 1917–1928. Available: [http://search.proquest.com.proxy-](http://search.proquest.com.proxy-remote.galib.uga.edu/docview/223949760?accountid=14537)  
456 [remote.galib.uga.edu/docview/223949760?accountid=14537](http://search.proquest.com.proxy-remote.galib.uga.edu/docview/223949760?accountid=14537)
- 457 22. Lee M-S, Walker RE, Mendelman PM. Medical burden of respiratory syncytial virus and  
458 parainfluenza virus type 3 infection among US children: Implications for design of vaccine  
459 trials. *Human Vaccines*. 2004;1: 5–11. doi:[10.4161/hv.1.1.1424](https://doi.org/10.4161/hv.1.1.1424)
- 460 23. Schmidt AC, Schaap-Nutt A, Bartlett EJ, Schomacker H, Boonyaratanakornkit J, Karron  
461 RA, et al. Progress in the development of human parainfluenza virus vaccines. *Expert*  
462 *Review of Respiratory Medicine*. 2011;5: 515–526. doi:[10.1586/ERS.11.32](https://doi.org/10.1586/ERS.11.32)
- 463 24. Schomacker H, Schaap-Nutt A, Collins PL, Schmidt AC. Pathogenesis of acute respiratory  
464 illness caused by human parainfluenza viruses. *Current Opinion in Virology*. 2012;2: 294–  
465 299. doi:[10.1016/j.coviro.2012.02.001](https://doi.org/10.1016/j.coviro.2012.02.001)
- 466 25. Sato M, Wright PF. Current status of vaccines for parainfluenza virus infections.  
467 [miscellaneous article]. *Journal October 2008*. 2008;27.  
468 doi:[10.1097/INF.0b013e318168b76f](https://doi.org/10.1097/INF.0b013e318168b76f)
- 469 26. GINSBERG HS, HORSFALL FL. Quantitative aspects of the multiplication of influenza a  
470 virus in the mouse lung; relation between the degree of viral multiplication and the extent  
471 of pneumonia. *The Journal of experimental medicine*. 1952;95: 135–145.
- 472 27. Ottolini MG, Porter DD, Hemming VG, Hensen SA, Sami IR, Prince GA. Semi-permissive  
473 replication and functional aspects of the immune response in a cotton rat model of human  
474 parainfluenza virus type 3 infection. *J Gen Virol*. 1996;77: 1739–1743. doi:[10.1099/0022-](https://doi.org/10.1099/0022-1317-77-8-1739)  
475 [1317-77-8-1739](https://doi.org/10.1099/0022-1317-77-8-1739)
- 476 28. Hayden FG, Fritz R, Lobo MC, Alvord W, Strober W, Straus SE. Local and systemic  
477 cytokine responses during experimental human influenza a virus infection. relation to  
478 symptom formation and host defense. *The Journal of clinical investigation*. 1998;101: 643–  
479 649. doi:[10.1172/JCI1355](https://doi.org/10.1172/JCI1355)
- 480 29. Li Y, Handel A. Modeling inoculum dose dependent patterns of acute virus infections.  
481 *Journal of theoretical biology*. 2014;347: 63–73. doi:[10.1016/j.jtbi.2014.01.008](https://doi.org/10.1016/j.jtbi.2014.01.008)

- 482 30. Beauchemin CAA, Handel A. A review of mathematical models of influenza a infections  
483 within a host or cell culture: Lessons learned and challenges ahead RID g-4619-2011. BMC  
484 Public Health. 2011;11. doi:[10.1186/1471-2458-11-S1-S7](https://doi.org/10.1186/1471-2458-11-S1-S7)
- 485 31. Smith AM, Perelson AS. Influenza a virus infection kinetics: Quantitative data and  
486 models. Wiley Interdisciplinary Reviews: Systems Biology and Medicine. 2011;3: 429–445.  
487 doi:[10.1002/wsbm.129](https://doi.org/10.1002/wsbm.129)
- 488 32. Dobrovolny HM, Reddy MB, Kamal MA, Rayner CR, Beauchemin CAA. Assessing  
489 mathematical models of influenza infections using features of the immune response. PLoS  
490 ONE. 2013;8: e57088. doi:[10.1371/journal.pone.0057088](https://doi.org/10.1371/journal.pone.0057088)
- 491 33. Cao P, Yan AW, Heffernan JM, Petrie S, Moss RG, Carolan LA, et al. Innate immunity and  
492 the inter-exposure interval determine the dynamics of secondary influenza virus infection  
493 and explain observed viral hierarchies. PLoS computational biology. Public Library of  
494 Science; 2015;11: e1004334.
- 495 34. Pawelek KA, Huynh GT, Quinlivan M, Cullinane A, Rong L, Perelson AS. Modeling within-  
496 host dynamics of influenza virus infection including immune responses. PLoS  
497 Computational Biology. 2012;8: 1–13. doi:[10.1371/journal.pcbi.1002588](https://doi.org/10.1371/journal.pcbi.1002588)
- 498 35. Bartlett EJ, Hennessey M, Skiadopoulos MH, Schmidt AC, Collins PL, Murphy BR, et al.  
499 Role of interferon in the replication of human parainfluenza virus type 1 wild type and  
500 mutant viruses in human ciliated airway epithelium. Journal of virology. 2008;82: 8059–  
501 8070. doi:[10.1128/JVI.02263-07](https://doi.org/10.1128/JVI.02263-07)
- 502 36. Potter CW, Oxford JS. Determinants of immunity to influenza infection in man. British  
503 medical bulletin. 1979;35: 69–75.
- 504 37. Handel A, Longini IM, Antia R. Towards a quantitative understanding of the Within-Host  
505 dynamics of influenza a infections. Journal of The Royal Society Interface. 2010;7: 35–47.  
506 doi:[10.1098/rsif.2009.0067](https://doi.org/10.1098/rsif.2009.0067)
- 507 38. Pawelek KA, Dor D, Salmeron C, Handel A. Within-host models of high and low  
508 pathogenic influenza virus infections: The role of macrophages. PloS one. 2016;11:  
509 e0150568. doi:[10.1371/journal.pone.0150568](https://doi.org/10.1371/journal.pone.0150568)
- 510 39. R Development Core Team. R: A language and environment for statistical computing  
511 [Internet]. Vienna, Austria: R Foundation for Statistical Computing; 2012. Available:  
512 <http://www.R-project.org/>
- 513 40. Johnson SG. The nlopt nonlinear-optimization package.
- 514 41. Soetaert K, Petzoldt T, Setzer RW. Solving differential equations in r: Package deSolve.  
515 Journal of Statistical Software. 2010;33: 1–25. doi:[10.18637/jss.v033.i09](https://doi.org/10.18637/jss.v033.i09)
- 516 42. Mark Mitchell BM, al TW et. Engauge digitizer software [Internet]. Available:  
517 <http://markummitchell.github.io/engauge-digitizer/>

- 518 43. Qin L, Gilbert PB, Corey L, McElrath MJ, Self SG. A framework for assessing  
519 immunological correlates of protection in vaccine trials. *J Infect Dis*. Statistical Center for  
520 HIV/AIDS Research; Prevention, Fred Hutchinson Cancer Research Center, Seattle, WA,  
521 USA. [lqin@scharp.org](mailto:lqin@scharp.org); 2007;196: 1304–1312. doi:[10.1086/522428](https://doi.org/10.1086/522428)
- 522 44. Plotkin SA. Vaccines: Correlates of vaccine-induced immunity. *Clin Infect Dis*. Sanofi  
523 Pasteur, Doylestown, Pennsylvania, USA. [stanley.plotkin@sanofipasteur.com](mailto:stanley.plotkin@sanofipasteur.com); 2008;47:  
524 401–409. doi:[10.1086/589862](https://doi.org/10.1086/589862)
- 525 45. Gilbert PB, Qin L, Self SG. Evaluating a surrogate endpoint at three levels, with  
526 application to vaccine development. *Stat Med*. Fred Hutchinson Cancer Research Center;  
527 Department of Biostatistics, University of Washington, Seattle, WA 98109, USA.  
528 [pgilbert@scharp.org](mailto:pgilbert@scharp.org); 2008;27: 4758–4778. doi:[10.1002/sim.3122](https://doi.org/10.1002/sim.3122)
- 529 46. Coudeville L, Bailleux F, Riche B, Megas F, Andre P, Ecochard R. Relationship between  
530 haemagglutination-inhibiting antibody titres and clinical protection against influenza:  
531 Development and application of a bayesian random-effects model. *BMC Med Res Methodol*.  
532 Sanofi pasteur, 2 avenue Pont Pasteur F-69367 Lyon cedex 07 France.  
533 [laurent.coudeville@sanofipasteur.com](mailto:laurent.coudeville@sanofipasteur.com); 2010;10: 18. doi:[10.1186/1471-2288-10-18](https://doi.org/10.1186/1471-2288-10-18)
- 534 47. Feldstein LR, Matrajt L, Elizabeth Halloran M, Keitel WA, Longini IM Jr, H5N1 Vaccine  
535 Working Group. Extrapolating theoretical efficacy of inactivated influenza a/h5n1 virus  
536 vaccine from human immunogenicity studies. *Vaccine*. Center for Inference; Dynamics of  
537 Infectious Diseases, Fred Hutchinson Cancer Research Center, Seattle, WA, United States;  
538 Department of Biostatistics, College of Public Health; Health Professions; College of  
539 Medicine, University of Florida, Gainesville, FL, United States. Electronic address:  
540 [ilongini@ufl.edu](mailto:ilongini@ufl.edu). 2016;34: 3796–3802.
- 541 48. Canini L, Carrat F. Population modeling of influenza A/H1N1 virus kinetics and  
542 symptom dynamics. *J Virol*. 2011;85: 2764–2770. doi:[10.1128/JVI.01318-10](https://doi.org/10.1128/JVI.01318-10)
- 543 49. Saenz RA, Quinlivan M, Elton D, MacRae S, Blunden AS, Mumford JA, et al. Dynamics of  
544 influenza virus infection and pathology. *Journal of Virology*. 2010;84: 3974–3983.  
545 doi:[10.1128/JVI.02078-09](https://doi.org/10.1128/JVI.02078-09)
- 546 50. Ben-Shachar R, Koelle K. Minimal within-host dengue models highlight the specific roles  
547 of the immune response in primary and secondary dengue infections. *Journal of the Royal*  
548 *Society, Interface*. 2015;12. doi:[10.1098/rsif.2014.0886](https://doi.org/10.1098/rsif.2014.0886)
- 549 51. Akondy RS, Johnson PLF, Nakaya HI, Edupuganti S, Mulligan MJ, Lawson B, et al. Initial  
550 viral load determines the magnitude of the human cd8 t cell response to yellow fever  
551 vaccination. *Proceedings of the National Academy of Sciences of the United States of*  
552 *America*. 2015;112: 3050–3055. doi:[10.1073/pnas.1500475112](https://doi.org/10.1073/pnas.1500475112)
- 553 52. Estcourt MJ, Létourneau S, McMichael AJ, Hanke T. Vaccine route, dose and type of  
554 delivery vector determine patterns of primary cd8+ t cell responses. *European journal of*  
555 *immunology*. 2005;35: 2532–2540. doi:[10.1002/eji.200535184](https://doi.org/10.1002/eji.200535184)

556 53. Wang Z, Kedzierski L, Nuessing S, Chua BYL, Quiñones-Parra SM, Huber VC, et al.  
557 Establishment of memory cd8+ t cells with live attenuated influenza virus across different  
558 vaccination doses. *The Journal of general virology*. 2016;97: 3205–3214.  
559 doi:[10.1099/jgv.0.000651](https://doi.org/10.1099/jgv.0.000651)
